# Supplementary material
Source: PubMed Central journal article supplement (PMC8016176)
Supplement: ehp7944.smcontents.508.pdf [file ehp7944.smcontents.508.pdf]

**Note to readers with disabilities:** *EHP* strives to ensure that all journal content is accessible to all readers. However, some figures and Supplemental Material published in *EHP* articles may not conform to [508 standards](#) due to the complexity of the information being presented. If you need assistance accessing journal content, please contact [ehp508@niehs.nih.gov](mailto:ehp508@niehs.nih.gov). Our staff will work with you to assess and meet your accessibility needs within 3 working days.

### Supplemental Material

#### **Ambient Fine Particulate Matter Air Pollution and Risk of Weight Gain and Obesity in United States Veterans: An Observational Cohort Study**

Benjamin Bowe, Andrew K. Gibson, Yan Xie, Yan Yan, Aaron van Donkelaar, Randall V. Martin, and Ziyad Al-Aly

#### **Table of Contents**

**Table S1.** Contextual variable definitions and data sources.

**Table S2.** PM<sub>2.5</sub> distribution by year of follow-up in a national cohort of United States Veterans selected from July 1, 2010 through June 31, 2011 and followed until December 31, 2018 (n=3 902 440).

**Table S3.** Model parameters of the top three best-fitting models for each outcome based on the Shape Constrained Health Impact Function (SCHIF) in a national cohort of United States Veterans selected from July 1, 2010 through June 31, 2011 and followed until December 31, 2018 (n=3 902 440).

**Table S4.** Weight gain by cumulative average PM<sub>2.5</sub> exposure in a national cohort of United States Veterans selected from July 1, 2010 through June 31, 2011 and followed until December 31, 2018 (n=3 902 440).

**Table S5.** BMI gain by cumulative average PM<sub>2.5</sub> exposure in a national cohort of United States Veterans selected from July 1, 2010 through June 31, 2011 and followed until December 31, 2018 (n=3 902 440).

**Table S6.** Additional sensitivity analyses of survival outcomes in a national cohort of United States Veterans selected from July 1, 2010 through June 31, 2011 and followed until December 31, 2018 (n=3 902 440).

**Table S7.** Analyses of additional survival outcomes in a national cohort of United States Veterans selected from July 1, 2010 through June 31, 2011 and followed until December 31, 2018 (n=3 902 440).

**Table S8.** Additional sensitivity analyses of intra-individual change in BMI and weight in a national cohort of United States Veterans selected from July 1, 2010 through June 31, 2011 and followed until December 31, 2018 (n=3 902 440).

**Figure S1.** Cohort construction flowchart of a national cohort of United States Veterans selected from July 1, 2010 through June 31, 2011 and followed until December 31, 2018 (n=3 902 440).

**Figure S2.** Conceptual framework of the association of PM<sub>2.5</sub> with obesity and weight gain.

**Figure S3.** PM<sub>2.5</sub> distribution by year of follow-up in a national cohort of United States Veterans selected from July 1, 2010 through June 31, 2011 and followed until December 31, 2018 (n=3 902 440). Area indicates the distribution of PM<sub>2.5</sub> for subjects in the cohort during each year of follow-up. Distributions are weighted by participant time in cohort in that year.

**Figure S4.** Association of PM<sub>2.5</sub> exposure with risk of obesity and gain in weight based on the optimal model in a national cohort of United States Veterans selected from July 1, 2010 through June 31, 2011 and followed until December 31, 2018 (n=3 902 440). (A) Obesity, (B) 10 lbs. gain in weight. A Shape Constrained Health Impact Function (SCHIF) modeling approach was used. Models were adjusted for height, weight, and/or BMI, State of residence, age, race, sex, smoking status, Area Deprivation Index, normalized difference vegetation index, county-level % rural residency, population density, % limited access to healthy food, % access to exercise opportunities, and % of adults reporting excessive alcohol consumption. Lines represent the estimated difference in risk associated with a given PM<sub>2.5</sub> concentration compared to with the reference concentration of 1 µg/m<sup>3</sup> (in consideration of the log-linear form). Bands represent the 95% confidence interval. 2.205 pounds = 1 kilogram. Model parameters of the optimal model are reported in Table S3.

**Figure S5.** Association of PM<sub>2.5</sub> exposure with intra-individual change in BMI and weight in a national cohort of United States Veterans selected from July 1, 2010 through June 31, 2011 and followed until December 31, 2018 (n=3 902 440). (A) BMI, (B) weight. Change is reported as change per year. Linear mixed models were used to obtain rates of change in outcomes associated with PM<sub>2.5</sub>, where PM<sub>2.5</sub> was treated as a restricted cubic spline. Models were adjusted for height, weight, and/or BMI, State of residence, age, race, sex, Area Deprivation Index, normalized difference vegetation index, county-level % rural residency, population density, % limited access to healthy food, % access to exercise opportunities, % of adults reporting excessive alcohol consumption and smoking status. There was no missing data, so no imputation was used. Bands represent the 95% confidence interval. 2.205 pounds = 1 kilogram. Values were excluded below the 1st and above the 99th percentiles of the PM<sub>2.5</sub> distribution, and the 1st percentile serves as the reference value.

## References
